# Supplementary material for: Structural and compositional tuning of layered subnitrides; new complex nitride halides
Source: Royal Society of Chemistry journal article supplement (doi:10.1039/c0dt00214c), 2010-01-01
Supplement: c0dt00214c.pdf [file c0dt00214c.pdf]

## **Structural and compositional tuning of layered subnitrides; new complex nitride halides**

**Michael A. Brogan<sup>a</sup>, Robert W. Hughes<sup>b</sup>, Ronald I. Smith<sup>c</sup> and Duncan H. Gregory<sup>b\*</sup>.**

*Supplementary information (ESI)*

<sup>a</sup> *School of Chemistry, University of Nottingham, Nottingham, United Kingdom, NG7 2RD*

<sup>b</sup> *WestCHEM, University of Glasgow, Glasgow, United Kingdom, G12 8QQ E-mail:  
D.Gregory@chem.gla.ac.uk*

<sup>c</sup> *ISIS Pulsed Neutron and Muon Source, Science and Technology Facilities Council, Rutherford  
Appleton Laboratory, Didcot OX11 0QX*

Table ES1. Anisotropic temperature factors for  $\text{Ca}_{2-x}\text{Sr}_x\text{NX}$  from PND.

| Formula                                          | 100 x $U_{\text{anis}}$ | $U_{11}$   | $U_{33}$   | $U_{12}$   |
|--------------------------------------------------|-------------------------|------------|------------|------------|
| <b>Ca<sub>1.46</sub>Sr<sub>0.54</sub>NCl (1)</b> | Ca / Sr                 | 0.883 (19) | 1.056 (32) | 0.442 (9)  |
|                                                  | N                       | 0.947 (18) | 1.199 (33) | 0.474 (9)  |
|                                                  | Cl                      | 1.564 (21) | 1.442 (31) | 0.782 (11) |
| <b>Ca<sub>0.94</sub>Sr<sub>1.06</sub>NCl (2)</b> | Ca / Sr                 | 0.905 (27) | 1.089 (47) | 0.453 (13) |
|                                                  | N                       | 1.137 (28) | 1.321 (51) | 0.568 (14) |
|                                                  | Cl                      | 1.540 (32) | 1.842 (48) | 0.770 (16) |
| <b>Ca<sub>0.40</sub>Sr<sub>1.60</sub>NCl (3)</b> | Ca / Sr                 | 0.779 (17) | 1.005 (32) | 0.390 (9)  |
|                                                  | N                       | 0.938 (19) | 1.289 (36) | 0.469 (9)  |
|                                                  | Cl                      | 1.523 (22) | 1.272 (34) | 0.762 (11) |
| <b>Ca<sub>1.52</sub>Sr<sub>0.48</sub>NBr (4)</b> | Ca / Sr                 | 0.783 (15) | 1.139 (26) | 0.391 (8)  |
|                                                  | N                       | 0.964 (14) | 1.327 (27) | 0.482 (7)  |
|                                                  | Br                      | 1.362 (19) | 1.369 (33) | 0.681 (9)  |
| <b>Ca<sub>0.95</sub>Sr<sub>1.05</sub>NBr (5)</b> | Ca / Sr                 | 0.724 (23) | 1.165 (41) | 0.362 (11) |
|                                                  | N                       | 1.151 (24) | 1.328 (45) | 0.576 (12) |
|                                                  | Br                      | 1.615 (32) | 1.362 (56) | 0.807 (16) |
| <b>Ca<sub>0.18</sub>Sr<sub>1.82</sub>Br (6)</b>  | Ca / Sr                 | 0.981 (17) | 1.003 (28) | 0.490 (8)  |
|                                                  | N                       | 1.025 (17) | 1.215 (33) | 0.513 (8)  |
|                                                  | Br                      | 1.382 (23) | 1.478 (42) | 0.691 (12) |

$$U_{11} = U_{22}, U_{13} = U_{23}$$
